# Supplementary material
Source: PubMed Central journal article supplement (PMC4270386)
Supplement: bi5006078_si_001.pdf [file bi5006078_si_001.pdf]

Table S1.

Site-directed Mutagenesis Primers

| Mutant      | Forward or Reverse Primer | Primer Sequence                                    |
|-------------|---------------------------|----------------------------------------------------|
| E47A        | Forward                   | CTT TTT CTT CAA GGA TGC ACC GCT GAA CAC<br>CTT CC  |
|             | Reverse                   | GGA AGG TGT TCA GCG GTG CAT CCT TGA AGA<br>AAA AG  |
| P48A        | Forward                   | AGG TGT TCA GCG CTT CAT CCT TGA AGA AAA<br>AGG TCT |
|             | Reverse                   | AGA CCT TTT TCT TCA AGG ATG AAG CGC TGA<br>ACA CCT |
| Y64A        | Forward                   | GAA GCG GTT TCA GGG AGG CCT TCT CCA GCT<br>CCT TGC |
|             | Reverse                   | GCA AGG AGC TGG AGA AGG CCT CCC TGA AAC<br>CGC TTC |
| D142A       | Forward                   | ACA GGA TCT TGC CGG CCA GGA TGA GCT CC             |
|             | Reverse                   | GGA GCT CAT CCT GGC CGG CAA GAT CCT GT             |
| R153A       | Forward                   | GTG GAC ACC AAC TAC GCG GGC CTG GGC A              |
|             | Reverse                   | TGC CCA GGC CCG CGT AGT TGG TGT CCA C              |
| H178A       | Forward                   | GGC TGG AAC AGA GAA CGG CGT ACA CAT TGA<br>TGC CGT |
|             | Reverse                   | ACG GCA TCA ATG TGT ACG CCG TTC TCT GTT<br>CCA GCC |
| C181A       | Forward                   | ATG TGT ACC ACG TTC TCG CTT CCA GCC ACT<br>ACT CCG |
|             | Reverse                   | CGG AGT AGT GGC TGG AAG CGA GAA CGT GGT<br>ACA     |
| S186A       | Forward                   | CCA GCC ACT ACG CCG CCC GGG TG                     |
|             | Reverse                   | CAC CCG GGC GGC GTA GTG GCT GG                     |
| S182A/S186A | Forward                   | TCA ATG TGT ACC ACG TTC TCT GTG CCA GCC<br>ACT ACG |
|             | Reverse                   | CGT AGT GGC TGG CAC AGA GAA CGT GGT ACA            |
| H220A       | Forward                   | CCG GCG GCC CCG GCC GTA GGC ATC CA                 |
|             | Reverse                   | TGG ATG CCT ACG GCC GGG GCC GCC GG                 |

Table S2.

## AANATA product characterization.

| Sample                             | Retention Time | Mass/Charge            |
|------------------------------------|----------------|------------------------|
|                                    | (min)          | [M + H] ( <i>m/z</i> ) |
| <i>N</i> -acetylserotonin Standard | 0.78           | 219.1132               |
| AANAT A Enzyme Assay <sup>a</sup>  | 0.78           | 219.1133               |

<sup>a</sup> Reaction condition – 300 mM Tris-HCl pH 8.0, 500  $\mu$ M acetyl-CoA, 1 mM serotonin, 15  $\mu$ g AANATA.

Table S3.

Conserved *D. melanogaster* AANATA Arg153 Found in other GNAT Enzymes

| Organism     | Enzyme     | PDB Data Base ID<br>for Crystal Structure | Conserved Arginine |
|--------------|------------|-------------------------------------------|--------------------|
| Drosophila   | AANATA     | 3TE4                                      | R153               |
| Sheep        | SNAT       | 1CJW                                      | R131               |
| Human        | SSAT       | 2JEV                                      | R101               |
| Tuberculosis | AgNAT      | 1M4G                                      | R91                |
| Yeast        | HAT (Hpa2) | 1QSM                                      | R100               |
| Human        | NMT        | 3JTK                                      | R255               |

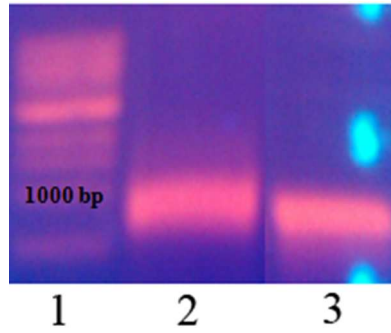

Figure S1. Cloning of *AANATA* and *AANATB* from *D. melanogaster*. (Lane 1) 1 kb DNA ladder (New England Biolabs), (Lane 2) *AANATB*; 828 bp band, (Lane 3) *AANATA*; 723 bp band.

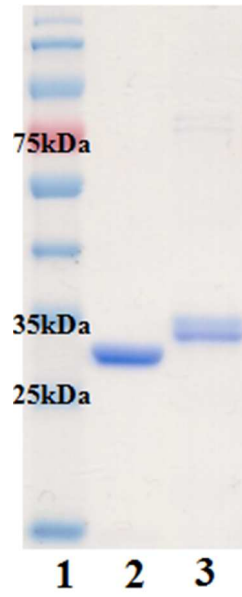

Figure S2. SDS-PAGE gel for purified AANATA and AANATB. (Lane 1) Precision Plus Protein™ Kaleidoscope™ Standards (Biorad), (Lane 2) AANATA; 27 kDa, (Lane 3) AANATB; 31 kDa.

```

AANATA      LIQPEDGEAVIAMLKTFFFKDEEPLNTFLDL----GECKELEKYSLKPLPDNCSYKAVNK 80
AANATB      LIQPEDGEAVIAMLKTFFFKDEEPLNTFLDL----GECKELEKYSLKPLPDNCSYKAVNK 115
AANATL2 (CG9486)  AMTIGDYEEVEAFLAVHFFKQEPLMLI PQEDPKQSEVSSAEAELHRS LI PQDLSLVAVD- 66
AANATL3 (CG10659) TMTKEDYPSVKAFLKDNFFQSEPLCQSTSE-NVQSQNEKENDEYHLSMIAQGTCLVAIDE 71
AANATL4 (CG18607) IMRPEDYAQVKA YMEAEYTSEPLCQSSGE-PVHQQNEEINDAFNQSI I AEGTSL LALDE 71
AANATL5 (CG10476) VMKEDDYPRVKT FMTDYFHYDEPMGMGLEE-P IHLQHEEEVDRQYLAVI RQGLSIVALDD 71
AANATL6 (CG18606) VMKEDDYPRVKT FMTDYFHYDEPMGMGLEE-P IHLQHEEEVDRQYLAVI RQGLSIVALDD 71
AANATL7 (CG13759) MIAPEHSEQVMEHLRRNFFADEPLNKAAGL-CQNGSSCPALEAHCAEAI QHRMSVMAVDA 63
AANATL8 (CG15766) QVDVGETEQLMT FLLAHYYPEEPLTAGTHP----PEPEAADKEFLLSNV PFGTCFVALH- 67
      : . : : : . * *: : . * :
AANATA      PDEELILDGKILSVDTNYRGLGIAGRLTERAYEYMRENGINVYHVLCSSHYSARVMEKLG 194
AANATB      PDEELILDGKILSVDTNYRGLGIAGRLTERAYEYMRENGINVYHVLCSSHYSARVMEKLG 229
AANATL2 (CG9486)  G-VERALYLYMLGVDVSIRRQRVGTRLVEATI ELGRQRFPPVVTSTCSNONSKRLMTALN 179
AANATL3 (CG10659)  G-ISKLLYSHIT SVESSMRGKGLGSR LAATIMDVGRAGFPAMTAYCTSFYSARQKEALG 185
AANATL4 (CG18607)  D-IPKALYSHVT SVASWKRGKGLGSR LAATIMELGRSNGFPLMMAFCTSFYSARQK GALG 187
AANATL5 (CG10476)  G-VSSYLSLLVI SVHPSMRQRGILVILSKCLF KLGRLRGLR LFTGSGTNHYSSRSAMKAG 185
AANATL6 (CG18606)  G-VSSYLSLLVI SVHPSMRQRGILVILSKCLF KLGRLRHTLFT TSGTNHYSSRSAMKAG 185
AANATL7 (CG13759)  D-VDCMFDVRI LSVDSCYRGQGIANELVKRSVAVAKKNGFRL LKADATGGIFSQKIFRSHG 179
AANATL8 (CG15766)  S-VPSCLHVHALGVD PQLRGRNLGGR LMETVAQRGRDLGHQLVSVDCTSVYSARLVQRLG 179
      : . * * : * : * : . * :
AANATA      FHEVFRMQFADYK-PQGEVVF KPAAPHVGIQVMAKEVGPAAQAQTKL-- 240
AANATB      FHEVFRMQFADYK-PQGEVVF KPAAPHVGIQVMAKEVGPAAQAQTKL-- 275
AANATL2 (CG9486)  MECILTKDYADYKDEHGEIVLRASEPHTSASVVA IRL----- 216
AANATL3 (CG10659)  MKCVHSLPYADYKDDQGRPI FT PAEPHTMARIMFIKL----- 222
AANATL4 (CG18607)  MECIYSIDYADYKDEGRVI FT PAAPHTKLRVMAIKL----- 224
AANATL5 (CG10476)  CECIHSVAYADYKDEQGRPI YNPPAPHTHIRVLASKL----- 222
AANATL6 (CG18606)  CECIHSVAYADYKDELGRPI YNPPAPHTHIRVLASKM----- 222
AANATL7 (CG13759)  FEVVFSEQPYSKYTDENGKVI LPVEAPHIKLOOLYKAI CADDQDEKKQSL 228
AANATL8 (CG15766)  YQLINTLRYVDHLDASGQVIRPPPPHESVQTFVLHL----- 216
      . . : : . * : ** . :

```

Figure S3. Primary sequence alignment of AANATA with putative AANATL enzymes found in *D. melanogaster* using clustalW2.

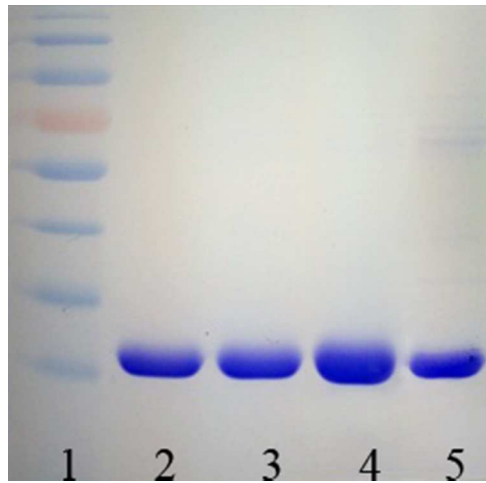

Figure S4. SDS-PAGE gel of purified AANATA mutants. (Lane 1) PageRuler™ Prestained protein ladder (Thermo Scientific), (Lane 2) E47A, (Lane 3) R153A, (Lane 4) S186A, (Lane 5) H220A.

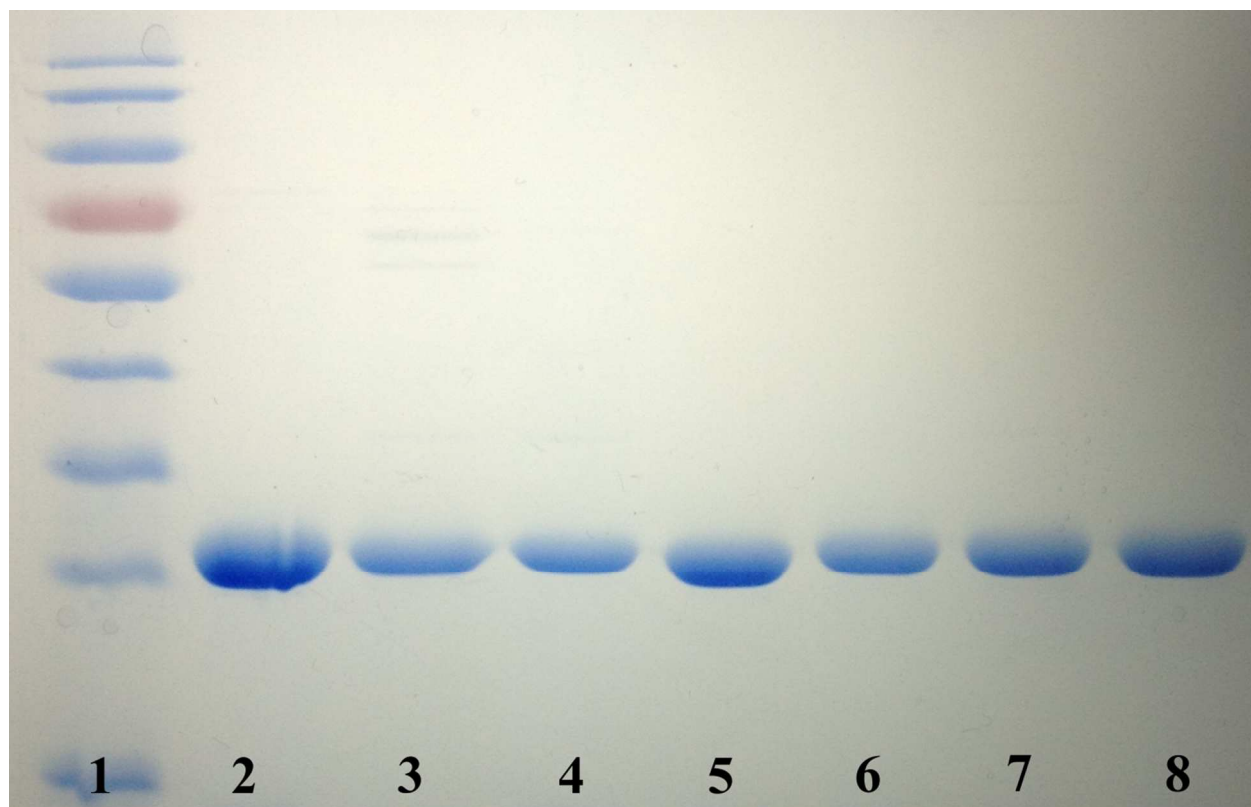

Figure S5. SDS-PAGE gel of purified AANATA mutants. (Lane 1) PageRuler™ Prestained protein ladder (Thermo Scientific), (Lane 2) P48A, (Lane 3) Y64A, (Lane 4) D142A, (Lane 5) H178A, (Lane 5) C181A, (Lane 5) S182A/S186A.



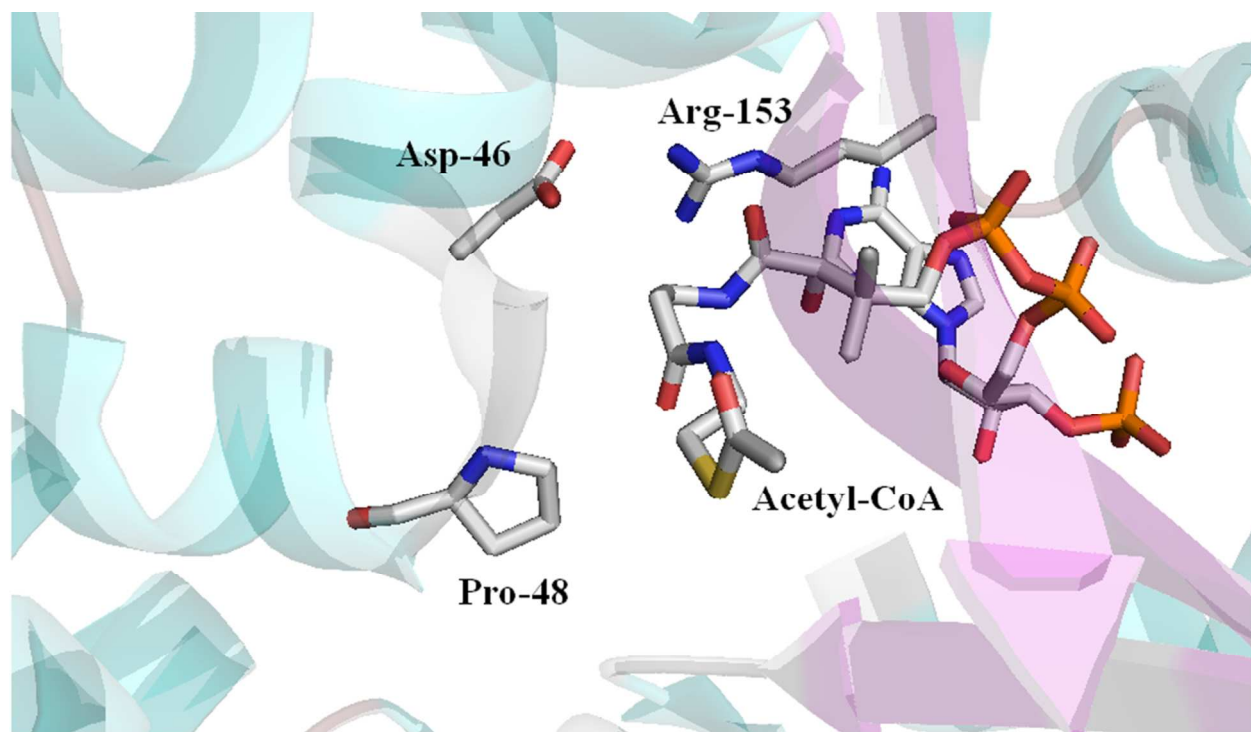

Figure S6. *D. melanogaster* AANATA Pro-48 (PDB: 3TE4) showing general location with respect to amine binding pocket and bound acetyl-CoA.
